# Supplementary material
Source: publisher figshare collection journal article supplement (https://sage.figshare.com/ndownloader/files/40903455)

## CONSORT 2010 Flow Diagram

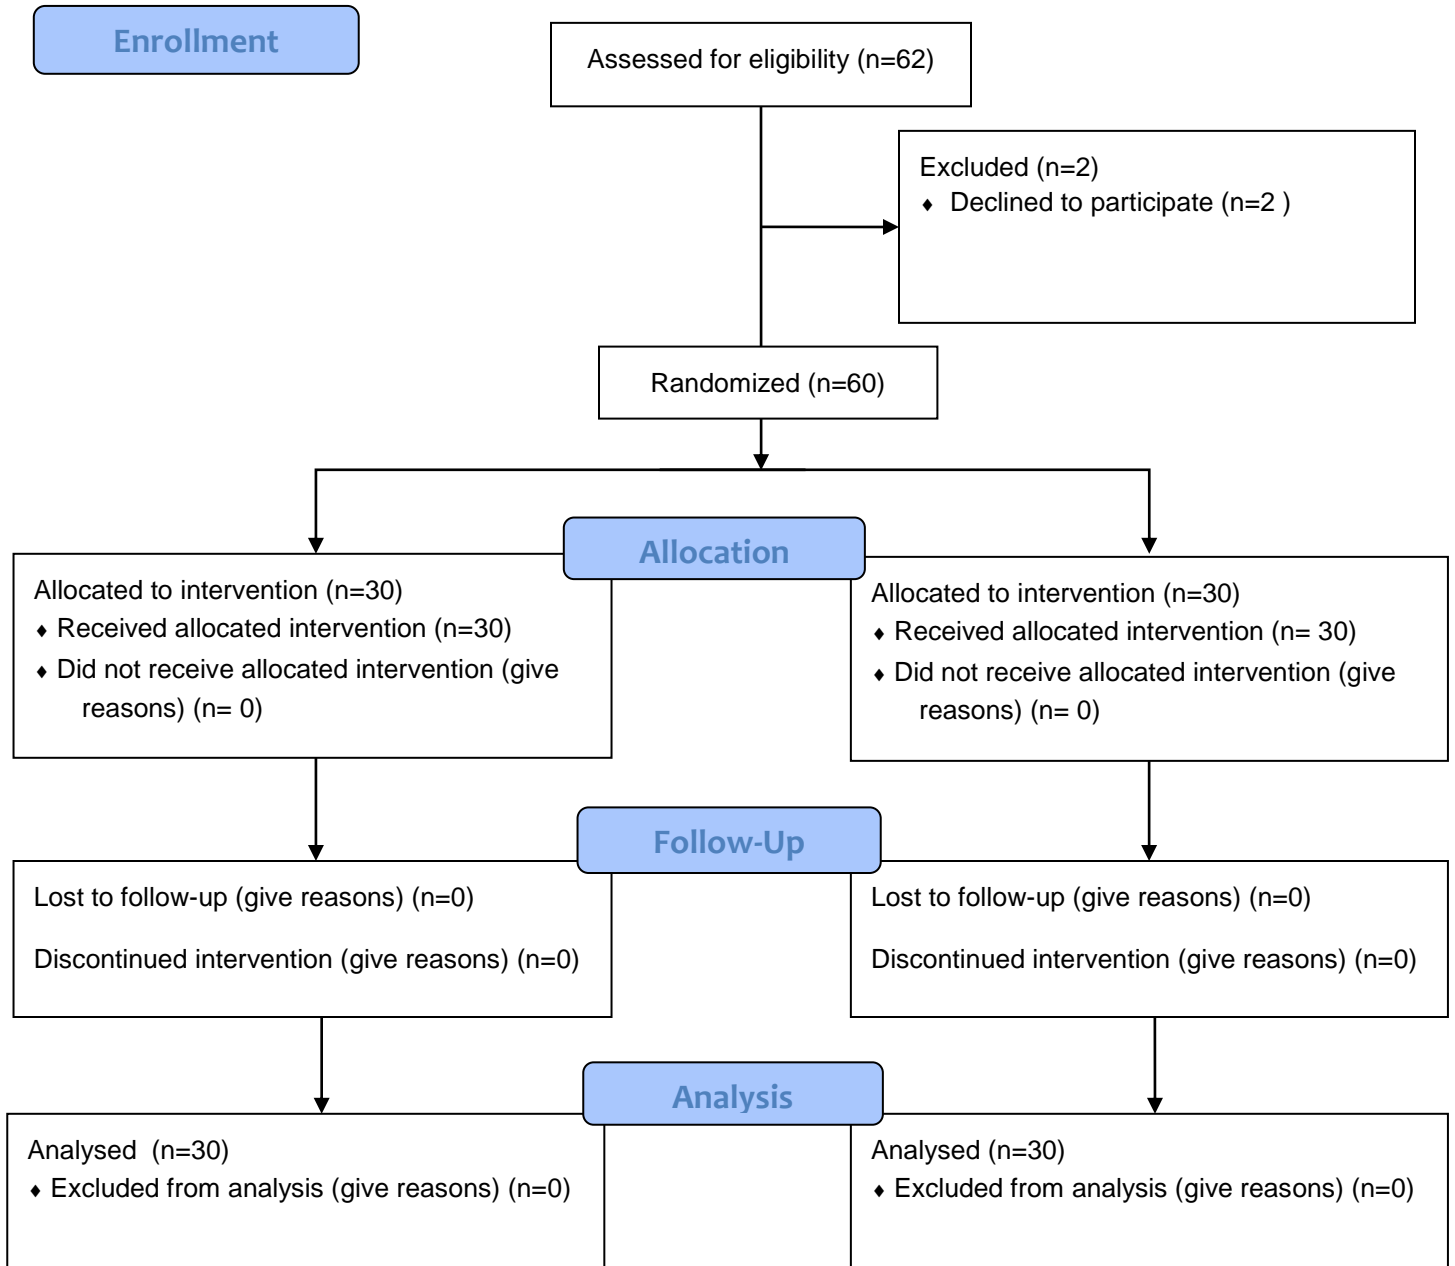

Supplement: Supplementary file 1 [file 40903455]
